# Supplementary material for: Epidemiology and Sequence-Based Evolutionary Analysis of Circulating Non-Polio Enteroviruses
Source: PubMed Central journal article supplement (PMC7759938; doi:10.3390/microorganisms8121856), 2020-11-25
Supplement: microorganisms-08-01856-s001.pdf [file microorganisms-08-01856-s001.pdf]

**Table S1.** Number of genomic sequence records for all non-polio EVs.

| <b>Number of sequences*</b> |                     | <b>Species</b> | <b>Type</b>        |
|-----------------------------|---------------------|----------------|--------------------|
| <b>All time</b>             | <b>2014 to 2019</b> |                |                    |
| 7174                        | 2890                | A              | Coxsackievirus A6  |
| 12720                       | 2413                | A              | Enterovirus A71    |
| 5318                        | 1627                | A              | Coxsackievirus A16 |
| 2068                        | 742                 | A              | Coxsackievirus A10 |
| 974                         | 435                 | A              | Coxsackievirus A4  |
| 418                         | 139                 | A              | Coxsackievirus A2  |
| 275                         | 111                 | A              | Coxsackievirus A5  |
| 175                         | 28                  | A              | Coxsackievirus A8  |
| 54                          | 11                  | A              | Coxsackievirus A12 |
| 20                          | 8                   | A              | Enterovirus A119   |
| 72                          | 6                   | A              | Coxsackievirus A14 |
| 11                          | 5                   | A              | Enterovirus A120   |
| 31                          | 1                   | A              | Coxsackievirus A7  |
| 13                          | 0                   | A              | Coxsackievirus A3  |
| 54                          | 0                   | A              | Enterovirus A76    |
| 16                          | 0                   | A              | Enterovirus A89    |
| 51                          | 0                   | A              | Enterovirus A90    |
| 4                           | 0                   | A              | Enterovirus A91    |
| 41                          | 0                   | A              | Enterovirus A92    |
| 1                           | 0                   | A              | Enterovirus A114   |
| 0                           | 0                   | A              | Enterovirus A121   |
| 2211                        | 653                 | B              | Echovirus 11       |
| 1850                        | 612                 | B              | Coxsackievirus B5  |
| 4402                        | 516                 | B              | Echovirus 30       |
| 2139                        | 497                 | B              | Echovirus 6        |
| 569                         | 211                 | B              | Echovirus 18       |
| 1244                        | 194                 | B              | Coxsackievirus B3  |
| 551                         | 178                 | B              | Echovirus 25       |
| 238                         | 166                 | B              | Echovirus 16       |
| 1100                        | 129                 | B              | Coxsackievirus B4  |
| 803                         | 106                 | B              | Echovirus 7        |
| 778                         | 97                  | B              | Echovirus 9        |
| 430                         | 90                  | B              | Echovirus 3        |
| 549                         | 75                  | B              | Coxsackievirus B2  |
| 539                         | 69                  | B              | Coxsackievirus B1  |
| 620                         | 68                  | B              | Coxsackievirus A9  |
| 365                         | 54                  | B              | Echovirus 19       |
| 957                         | 45                  | B              | Echovirus 13       |
| 188                         | 34                  | B              | Echovirus 20       |
| 151                         | 33                  | B              | Echovirus 1        |
| 137                         | 31                  | B              | Echovirus 21       |
| 258                         | 27                  | B              | Echovirus 14       |
| 142                         | 21                  | B              | Echovirus 24       |
| 150                         | 20                  | B              | Echovirus 29       |

|       |     |   |                    |
|-------|-----|---|--------------------|
| 122   | 18  | B | Echovirus 5        |
| 194   | 18  | B | Echovirus 33       |
| 160   | 10  | B | Echovirus 12       |
| 33    | 8   | B | Enterovirus B73    |
| 87    | 7   | B | Echovirus 2        |
| 30    | 7   | B | Echovirus 31       |
| 126   | 5   | B | Enterovirus B75    |
| 14    | 5   | B | Enterovirus B88    |
| 44    | 4   | B | Echovirus 15       |
| 130   | 3   | B | Echovirus 4        |
| 9     | 3   | B | Enterovirus B78    |
| 105   | 2   | B | Coxsackievirus B6  |
| 57    | 2   | B | Echovirus 17       |
| 44    | 2   | B | Echovirus 27       |
| 28    | 2   | B | Echovirus 32       |
| 44    | 2   | B | Enterovirus B69    |
| 59    | 1   | B | Enterovirus B80    |
| 12    | 1   | B | Enterovirus B84    |
| 2     | 1   | B | Enterovirus B111   |
| 24    | 0   | B | Echovirus 26       |
| 25    | 0   | B | Enterovirus B74    |
| 16    | 0   | B | Enterovirus B77    |
| 2     | 0   | B | Enterovirus B79    |
| 9     | 0   | B | Enterovirus B81    |
| 6     | 0   | B | Enterovirus B82    |
| 38    | 0   | B | Enterovirus B83    |
| 36    | 0   | B | Enterovirus B85    |
| 5     | 0   | B | Enterovirus B86    |
| 4     | 0   | B | Enterovirus B87    |
| 8     | 0   | B | Enterovirus B93    |
| 0     | 0   | B | Enterovirus B97    |
| 0     | 0   | B | Enterovirus B98    |
| 0     | 0   | B | Enterovirus B100   |
| 0     | 0   | B | Enterovirus B101   |
| 0     | 0   | B | Enterovirus B106   |
| 0     | 0   | B | Enterovirus B107   |
| <hr/> |     |   |                    |
| 974   | 157 | C | Coxsackievirus A24 |
| 258   | 33  | C | Coxsackievirus A13 |
| 154   | 27  | C | Coxsackievirus A21 |
| 133   | 27  | C | Enterovirus C99    |
| 101   | 26  | C | Enterovirus C96    |
| 153   | 24  | C | Coxsackievirus A20 |
| 56    | 21  | C | Coxsackievirus A22 |
| 25    | 10  | C | Enterovirus C109   |
| 23    | 8   | C | Enterovirus C116   |
| 14    | 6   | C | Enterovirus C105   |
| 40    | 5   | C | Coxsackievirus A1  |

|      |      |   |                    |
|------|------|---|--------------------|
| 53   | 5    | C | Coxsackievirus A11 |
| 27   | 5    | C | Coxsackievirus A19 |
| 73   | 3    | C | Coxsackievirus A17 |
| 27   | 2    | C | Enterovirus C104   |
| 5    | 1    | C | Enterovirus C95    |
| 4    | 1    | C | Enterovirus C102   |
| 7    | 1    | C | Enterovirus C117   |
| 5    | 0    | C | Enterovirus C118   |
| 3841 | 2895 | D | Enterovirus D68    |
| 45   | 0    | D | Enterovirus D70    |
| 8    | 1    | D | Enterovirus D94    |
| 8    | 1    | D | Enterovirus D111   |

\* The number of sequence records for each enterovirus type in ViPR (Table 1) was determined. The number of sequences was determined by collecting references to each NPEV sequence in the ViPR database. Search was performed using the "Gene/Protein Search," viruses Enterovirus A-D were included in the search. Search type included the "Gene Product Name" term "VP1". Data collection performed October 9th, 2020. Each reference was counted by "virus type" name and all aliases added together using Microsoft Excel
